# Supplementary material for: Rates, patterns, and predictors of specialty palliative care consultation among patients with acute-on-chronic liver failure
Source: PubMed Central journal article supplement (PMC10808910; doi:10.1016/j.jhepr.2023.100976), 2023-11-30
Supplement: mmc1.pdf [file mmc1.pdf]

**Rates, patterns, and predictors of specialty palliative care  
consultation among patients with ACLF**

Arpan Patel, Anne Walling, Fasiha Kanwal, Marina Serper, Ruben Hernaez, Vinay  
Sundaram, David Kaplan, Tamar Taddei, and Nadim Mahmud

Table of contents

|               |   |
|---------------|---|
| Table S1..... | 2 |
| Table S2..... | 3 |
| Table S3..... | 3 |
| Table S4..... | 3 |
| Table S5..... | 3 |
| Table S6..... | 5 |
| Table S7..... | 5 |
| Table S8..... | 6 |

**Table S1 – Identification of Acute Decompensations (ADs) for EASL-CLIF ACLF**

| <b>Decompensation</b>                                                                                                                                                                     | <b>Classification</b>                  | <b>ICD-9/10 or CPT Codes</b>                                                                                |                                |
|-------------------------------------------------------------------------------------------------------------------------------------------------------------------------------------------|----------------------------------------|-------------------------------------------------------------------------------------------------------------|--------------------------------|
| <b>Gastrointestinal Bleed*</b>                                                                                                                                                            |                                        |                                                                                                             |                                |
| <i>Algorithm: any of the following codes, in any position</i>                                                                                                                             | UGIB – PUD                             | 531.x, 532.x, 533.x, 534.x; K25.x, K26.x, K27.x, K28.x                                                      |                                |
|                                                                                                                                                                                           | UGIB – non-PUD                         | 456.0, 456.20, 535.x, 537.82, 537.83, 537.84, 578.0; I85.01, I85.11, K29.x, K31.819, K31.811, K31.82, K92.0 |                                |
|                                                                                                                                                                                           | Small bowel GIB                        | 562.0x, 569.84, 569.85, 569.86; K57.1x, K55.20, K55.21, K63.81                                              |                                |
|                                                                                                                                                                                           | LGIB                                   | 562.1x, 569.3; K57.3x, K62.5                                                                                |                                |
|                                                                                                                                                                                           | GIB – NOS                              | 578.1, 578.9; K92.1, K92.2                                                                                  |                                |
| <b>Infection**</b>                                                                                                                                                                        |                                        |                                                                                                             |                                |
| <i>Algorithm: any of the following codes, in any position</i>                                                                                                                             | Bacteremia                             | 038.x, 790.7; A40.x, A41.x                                                                                  |                                |
|                                                                                                                                                                                           | SST/<br>MSK                            | Cellulitis                                                                                                  | 681.x, 682.x; L03.x, K12.2     |
|                                                                                                                                                                                           |                                        | Septic arthritis                                                                                            | 711.0x excluding 711.08; M00.x |
|                                                                                                                                                                                           |                                        | Osteomyelitis                                                                                               | 730.0x, 730.1x, 730.2x; M86.x  |
|                                                                                                                                                                                           | Spontaneous Bacterial Peritonitis      | 567.23; K65.2                                                                                               |                                |
|                                                                                                                                                                                           | Pneumonia                              | 481.x, 482.x; J13, J14, J15.x, J18.1, A48.1                                                                 |                                |
|                                                                                                                                                                                           | Pyelonephritis/UTI                     | 590.x, 599.0; N10, N11.x, N12, N15.1, N15.9, N16, N28.84, N28.85, N28.86, N39.0                             |                                |
|                                                                                                                                                                                           | Other                                  | Endocarditis                                                                                                | 421.x; I33.0, I33.9, I39       |
|                                                                                                                                                                                           |                                        | Meningitis                                                                                                  | 320.x; G00.x, G01, G04.2       |
| Fungal Infection                                                                                                                                                                          | 112.5x, 117.3x, 995.91; B37.7x, B44.9x |                                                                                                             |                                |
| <b>Hepatic Encephalopathy***</b>                                                                                                                                                          |                                        |                                                                                                             |                                |
| <i>Algorithm: any of the following codes in any position PLUS lactulose OR rifaximin administered during inpatient admission (see supplemental table 4 for medication identification)</i> | Hepatic encephalopathy                 | 572.2; K72.91                                                                                               |                                |
|                                                                                                                                                                                           | Viral hepatitis with hepatic coma      | 070.0, 070.2x, 070.40, 070.41, 070.44, 070.49, 070.6; B15.0, B16.2, B19.11, B16.0, B17.11                   |                                |
| <b>Ascites</b>                                                                                                                                                                            |                                        |                                                                                                             |                                |
| <i>Algorithm: any of the following codes, in any position</i>                                                                                                                             | Ascites codes                          | 789.51, 789.59; R18.x                                                                                       |                                |
|                                                                                                                                                                                           | Paracentesis procedure codes           | 49080, 49081, 49082, 49083                                                                                  |                                |

\* Adapted from Abraham et al., Wahl et al., and Siddiqui et al.

\*\* Adapted from Schneeweiss et al. and Patkar et al.

\*\*\* Adapted from Lo Re et al.

**Table S2 – Identification of Respiratory Organ Failure***Algorithm: presence of any of the following inpatient CPT codes*

| ICD-9/10, ICD-9/10-CM, or CPT Codes                                                      | Description                           |
|------------------------------------------------------------------------------------------|---------------------------------------|
| 31500, 96.05                                                                             | Endotracheal intubation procedure     |
| 94002, 94003, 94004, 94005, 94656, 94657, 94660, 94662, 96.7x, 5A1935Z, 5A1945Z, 5A1955Z | Mechanical ventilation and management |
| Z99.11                                                                                   | Ventilator dependent status           |

**Table S3 – Identification of Brain Organ Failure***Algorithm: any of the hepatic encephalopathy ICD-9 codes in any position (see supplemental table 1) PLUS lactulose OR rifaximin administered within 28 days of inpatient admission.**Identification of these medications was performed as follows:*

| Medication | SQL Query (VHA database)                                                                       |
|------------|------------------------------------------------------------------------------------------------|
| Lactulose  | WHERE medication LIKE '%LACTULO%' OR medication LIKE '%CONSTULO%' OR medication LIKE '%ENULO%' |
| Rifaximin  | WHERE medication LIKE '%RIFAX%' OR medication LIKE '%XIFAX%'                                   |

*\*Obtained from the "BCMADispensedDrug" table in the VHA CDW; applied within 28 days of admission***Table S4 – Identification of Inpatient Renal Replacement Therapy***Algorithm: presence of any of the following inpatient CPT codes*

| CPT Code     | Description                          |
|--------------|--------------------------------------|
| 90935, 90937 | Hemodialysis                         |
| 90945, 90947 | Continuous renal replacement therapy |

**Table S5 – Identification of Vasopressors for Circulatory Failure**

| Vasopressors Classified                      | SQL Query (VHA database)                                                                                  |
|----------------------------------------------|-----------------------------------------------------------------------------------------------------------|
| Norepinephrine<br>Epinephrine<br>Vasopressin | WHERE medication LIKE '%EPINEPHRI%' OR medication LIKE '%VASOPRESSI%' OR medication LIKE '%DOBUTAMIN%' OR |

|                                         |                                                                                                     |
|-----------------------------------------|-----------------------------------------------------------------------------------------------------|
| Dobutamine<br>Dopamine<br>Phenylephrine | medication LIKE '%LEVOPHED%' OR medication LIKE '%DOPAMINE%'<br>OR medication LIKE '%PHENYLEPHRIN%' |
|-----------------------------------------|-----------------------------------------------------------------------------------------------------|

*\* Obtained from the "iv\_pharmacy\_patient" table in the VHA CDW; applied within 28 days of admission*

**Table S6 – Mixed-Effects Logistic Regression Models for Late Inpatient Palliative Care Consultation in 90-Day Mortality Subgroup\***

| Variable                                   | OR (95% CI)      | p-value |
|--------------------------------------------|------------------|---------|
| <b>Body Mass Index (per 5 unit change)</b> | 1.09 (1.03-1.15) | 0.001   |
| <b>MELD-Na</b>                             | 0.97 (0.96-0.98) | <0.001  |
| <b>ACLF Grade</b>                          |                  |         |
| 1                                          | (ref)            |         |
| 2                                          | 1.42 (1.19-1.68) | <0.001  |
| 3                                          | 2.07 (1.74-2.48) | <0.001  |
| <b>Prior Palliative Care Consultation</b>  | 0.46 (0.39-0.55) | <0.001  |
| <b>Hepatocellular Carcinoma</b>            | 0.58 (0.49-0.69) | <0.001  |
| <b>High CIRCOM Score</b>                   | 0.87 (0.76-0.99) | 0.04    |
| <b>Rural Center Location</b>               | 0.47 (0.25-0.88) | 0.02    |

\*Mixed effects models, designating VA facility as a random intercept, were used to generate odds ratios and p-values

\*\*Level of significance:  $p$ -value <0.001

*CIRCOM: cirrhosis comorbidity score*

**Table S7 – Mixed-Effects Logistic Regression Models for Inpatient Palliative Care Consultation, Evaluating the Potential Impact of ACLF Organ Failures\***

| Variable                                   | OR (95% CI)      | p-value |
|--------------------------------------------|------------------|---------|
| <b>Age (per year)</b>                      | 1.03 (1.03-1.04) | <0.001  |
| <b>Body Mass Index (per 5 unit change)</b> | 0.93 (0.90-0.95) | <0.001  |
| <b>MELD-Na</b>                             | 1.01 (1.01-1.02) | <0.001  |
| <b>Albumin (per 1 unit change)</b>         | 0.69 (0.65-0.73) | <0.001  |
| <b>WBC Count (per 5 unit change)</b>       | 1.05 (1.02-1.08) | <0.001  |
| <b>OF: Kidney</b>                          | 1.69 (1.54-1.87) | <0.001  |
| <b>OF: Liver</b>                           | 2.47 (2.20-2.76) | <0.001  |
| <b>OF: Coagulation</b>                     | 1.26 (1.15-1.39) | <0.001  |
| <b>OF: Brain</b>                           | 1.36 (1.23-1.50) | <0.001  |
| <b>OF: Circulatory</b>                     | 1.82 (1.66-1.99) | <0.001  |
| <b>Prior Palliative Care Consultation</b>  | 2.41 (2.17-2.69) | <0.001  |
| <b>Hepatocellular Carcinoma</b>            | 2.18 (1.95-2.42) | <0.001  |
| <b>High CIRCOM Score</b>                   | 0.70 (0.64-0.76) | <0.001  |
| <b>Cirrhosis Decompensation</b>            | 1.17 (1.08-1.27) | <0.001  |
| <b>Prior TIPS</b>                          | 0.66 (0.53-0.82) | <0.001  |

\*Mixed effects models, designating VA facility as a random intercept, were used to generate odds ratios and p-values

\*\*Level of significance:  $p$ -value <0.001

*CIRCOM: cirrhosis comorbidity score*

**Table S8 – Mixed-Effects Logistic Regression Model with Individual CIRCOM Components and Any Cancer History Variable\***

| <b>Variable</b>                            | <b>OR (95% CI)</b> | <b>p-value</b> |
|--------------------------------------------|--------------------|----------------|
| <b>Age (per year)</b>                      | 1.04 (1.03 - 1.04) | <0.001         |
| <b>Body Mass Index (per 5 unit change)</b> | 0.95 (0.92 - 0.98) | 0.001          |
| <b>MELD-Na</b>                             | 1.02 (1.02 - 1.03) | <0.001         |
| <b>Albumin (per 1 unit change)</b>         | 0.72 (0.67 - 0.77) | <0.001         |
| <b>WBC Count (per 5 unit change)</b>       | 1.03 (1.00 - 1.07) | 0.02           |
| <b>ACLF Grade</b>                          |                    |                |
| 1                                          | (ref)              |                |
| 2                                          | 1.74 (1.58 - 1.91) | <0.001         |
| 3                                          | 3.05 (2.73 - 3.41) | <0.001         |
| <b>Prior Palliative Care Consultation</b>  | 2.62 (2.35 - 2.93) | <0.001         |
| <b>COPD</b>                                | 0.86 (0.79 - 0.94) | 0.001          |
| <b>Chronic Kidney Disease</b>              | 0.61 (0.56 - 0.66) | <0.001         |
| <b>Heart Failure</b>                       | 0.83 (0.76 - 0.91) | <0.001         |
| <b>Drug Abuse</b>                          | 1.01 (0.92 - 1.12) | 0.78           |
| <b>Peripheral Artery Disease</b>           | 0.82 (0.74 - 0.92) | <0.001         |
| <b>Epilepsy</b>                            | 0.88 (0.76 - 1.01) | 0.08           |
| <b>History of Acute MI</b>                 | 1.19 (0.99 - 1.43) | 0.06           |
| <b>Active MI</b>                           | 1.02 (0.88 - 1.18) | 0.83           |
| <b>Any Cancer History</b>                  | 1.42 (1.31 - 1.54) | <0.001         |
| <b>Cirrhosis Decompensation</b>            | 1.15 (1.06 - 1.25) | 0.001          |
| <b>Prior TIPS</b>                          | 0.64 (0.52 - 0.80) | <0.001         |

\*Mixed effects models, designating VA facility as a random intercept, were used to generate odds ratios and p-values

\*\*Level of significance:  $p$ -value <0.001

*CIRCOM: cirrhosis comorbidity score*
